# Supplementary material
Source: MDPI journal article supplement (https://www.mdpi.com/2077-0472/14/2/326)
Supplement: s1 [file s1 › agriculture-2822921-supplementary.pdf]

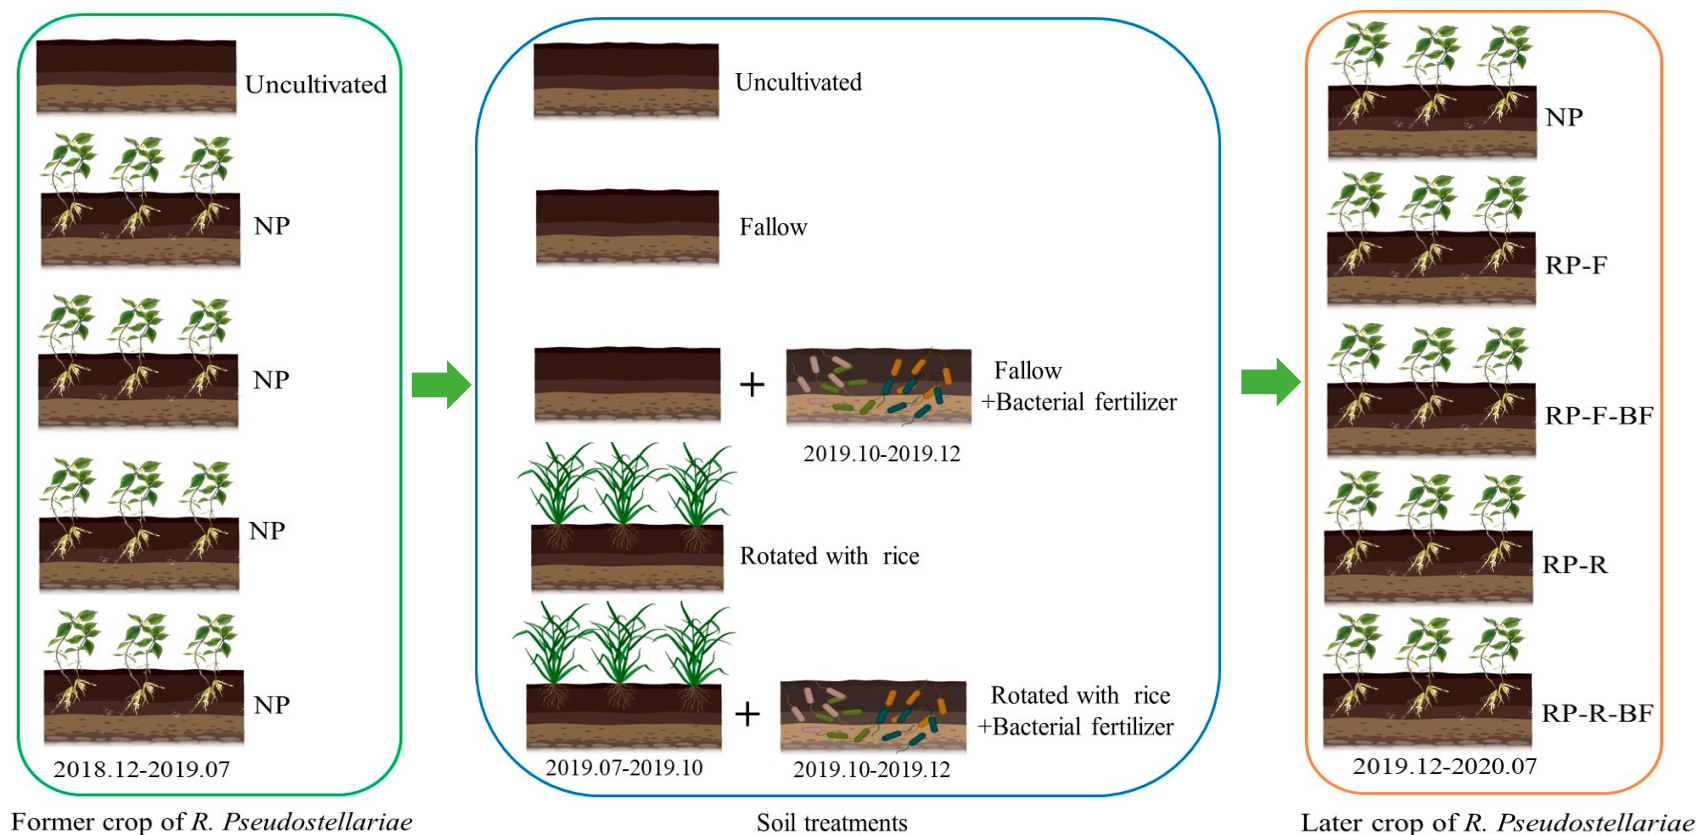

**Figure S1.** Schematic diagram of soil treatments of *R. pseudostellariae* in 2019 and 2020. NP: the newly planting *Radix pseudostellariae*. RP-F: the keeping soil fallow after harvesting *Radix pseudostellariae*. RP-F-BF: applying bio-microbial fertilizer in fallow soil before the next planting period of *Radix pseudostellariae*. RP-R: *Radix pseudostellariae* rotated with rice. RP-R-BF: applying bio-microbial fertilizer in the soil after harvesting the rice rotated with *Radix pseudostellariae*.

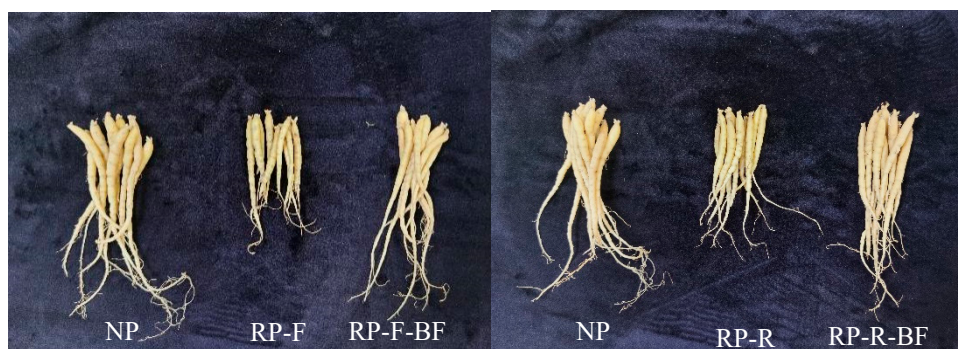

**Figure S2.** Appearance and morphology of *R. Pseudostellariae* root tubers under different treatments. Treatments are the same as those given in Figure S1.

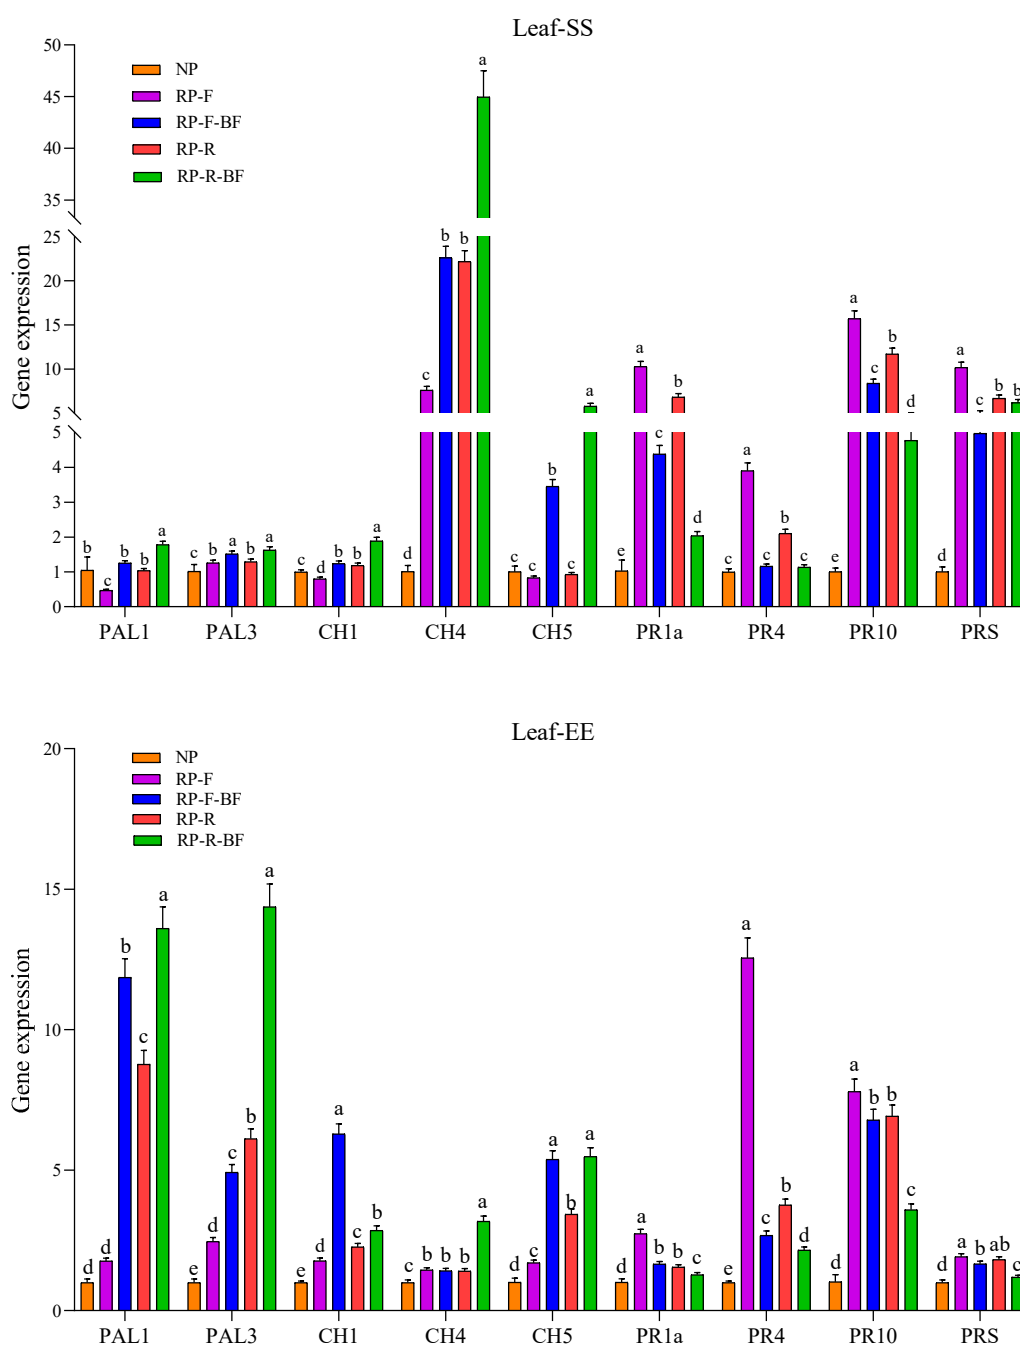

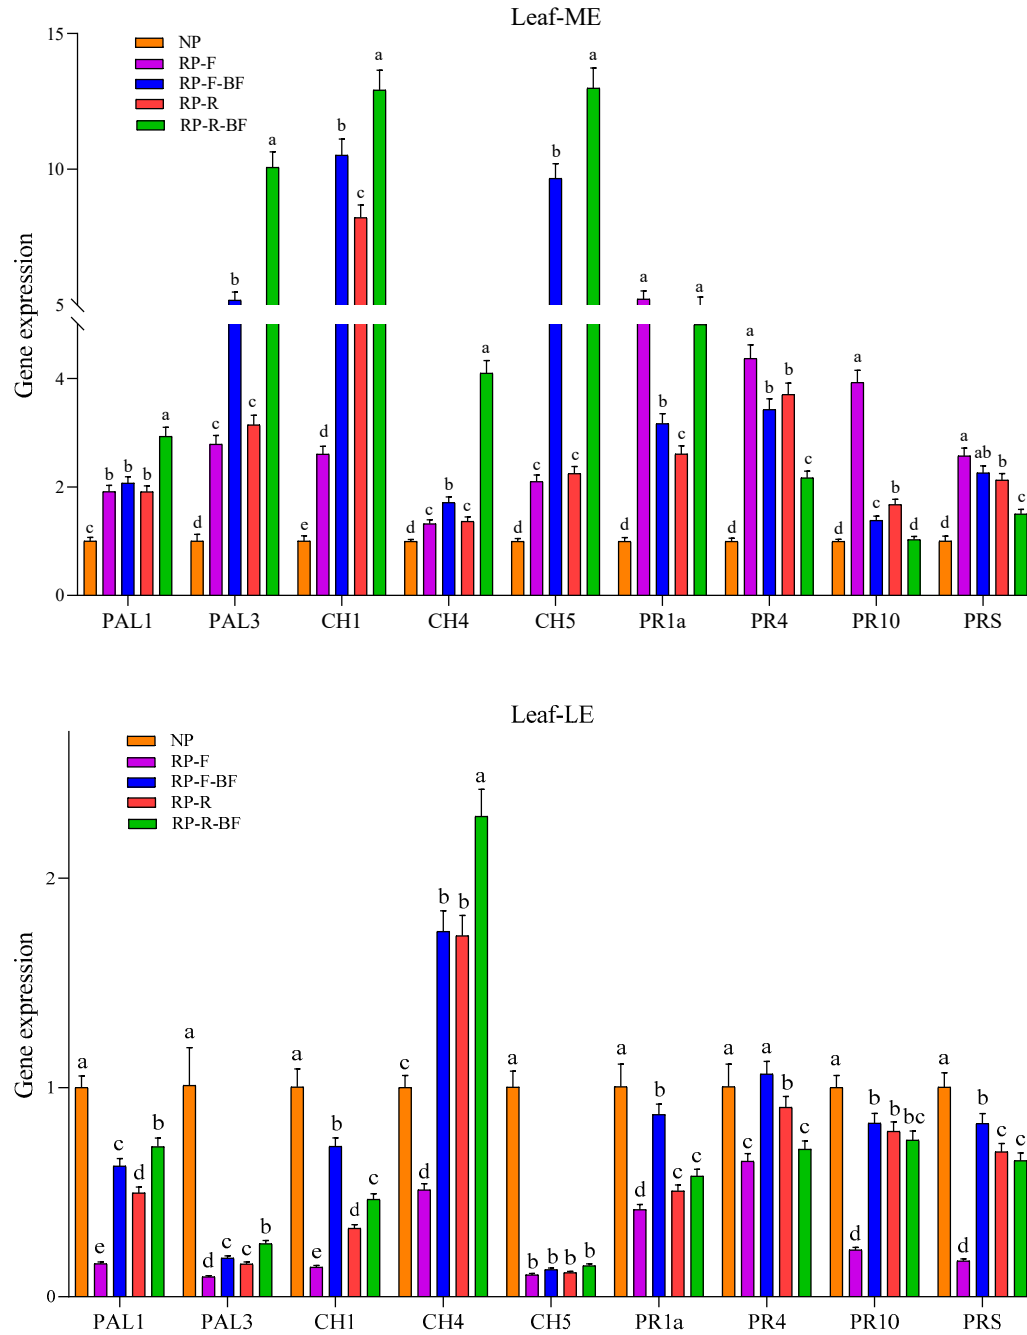

**Figure S3.** Differential expression of disease resistance and defense related genes in the leaves of *R. pseudostellariae* under different treatments. Treatments are the same as those given in Figure S1. SS: the seedling stage. EE: the early expanding stage of tuber roots. ME: the middle expanding stage of tuber roots. LE: the late expanding stage of tuber roots. Different lowercase letters indicate significant differences between different treatments at  $p < 0.05$ .

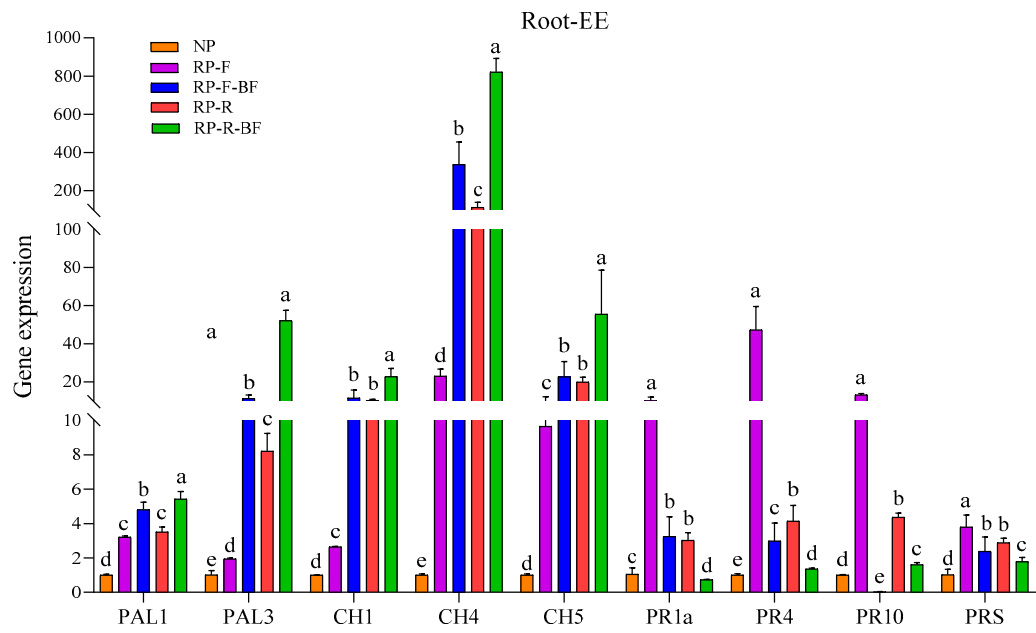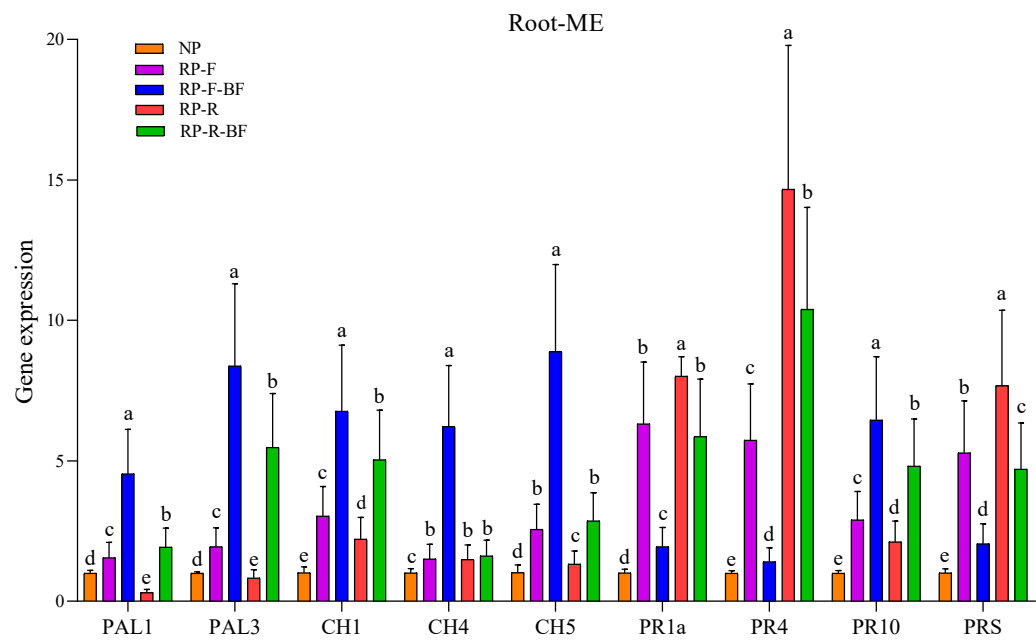

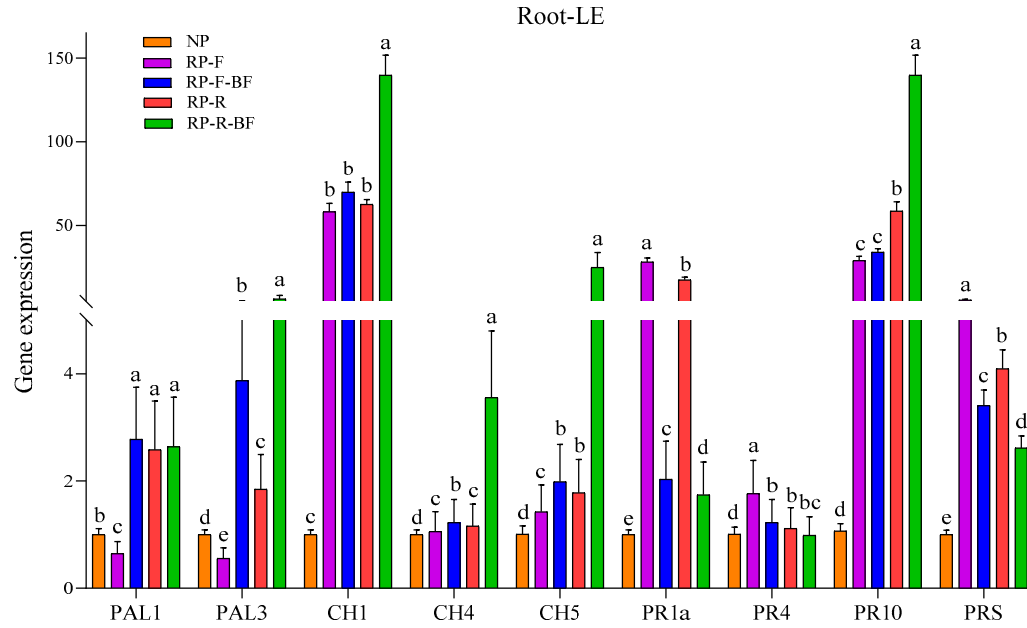

**Figure S4.** Differential expression of disease resistance and defense related genes in the root tubers of *R. pseudostellariae* under different treatments. Treatments are the same as those given in Figure S1. SS: the seedling stage. EE: the early expanding stage of tuber roots. ME: the middle expanding stage of tuber roots. LE: the late expanding stage of tuber roots. Different lowercase letters indicate significant differences between different treatments at  $p < 0.05$ .

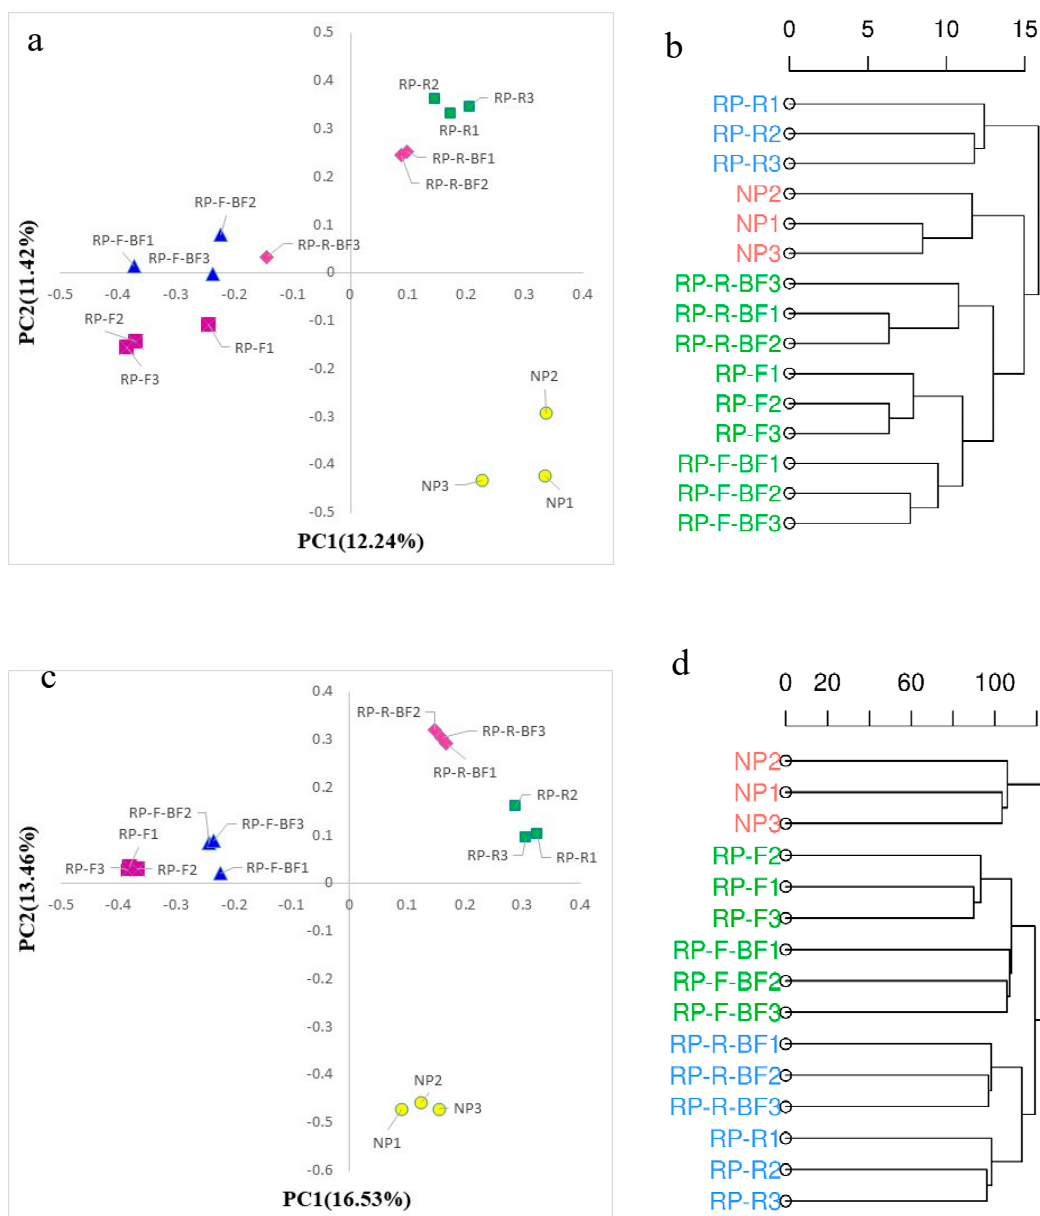

**Figure S5.** Principal component analysis and cluster analysis of microbial communities in the rhizosphere soil of *R. pseudostellariae* under different treatments. Treatments are the same as those given in Figure S1. (a and b) show principal component analysis and cluster analysis of fungal communities, and (c and d) show principal component analysis and cluster analysis of bacterial communities.

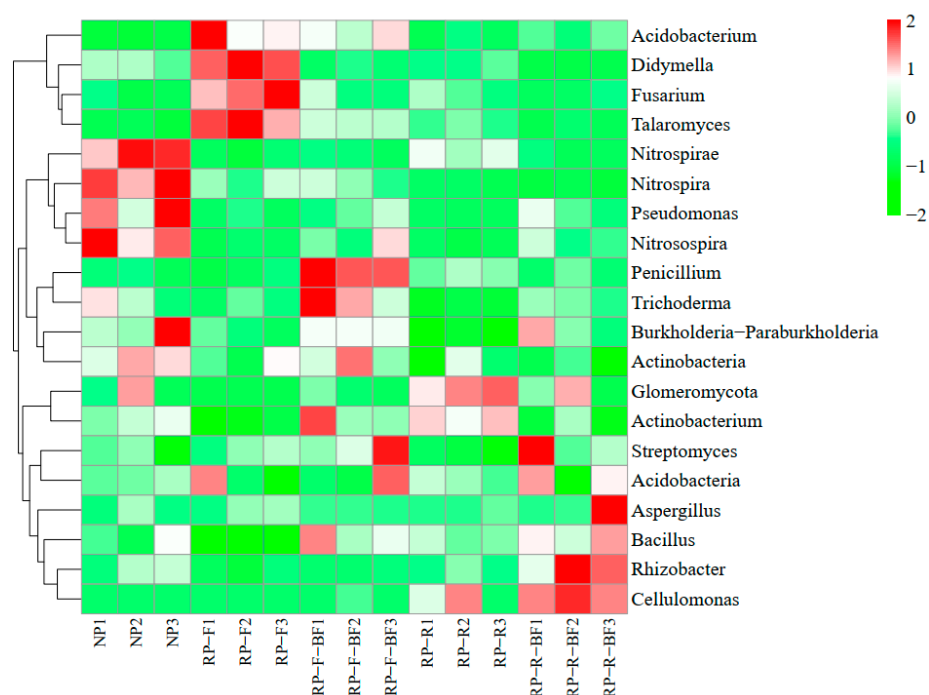

**Figure S6.** The abundance of microbial species in the rhizosphere soil of *R. pseudostellariae* under different treatments. Treatments are the same as those given in Figure S1.

**Table S1.** Primer sequence of defense related genes.

| Function name                       | Primer ID | Primer Sequence (5'-3') | Products |
|-------------------------------------|-----------|-------------------------|----------|
| Chitinase 1                         | CH1-F     | CCCAATCCAACCTAACCTG     | 232 bp   |
|                                     | CH1-R     | ACTTGACACGGCTCCTAA      |          |
| Chitinase class IV                  | CH4-F     | CTCTAGTTACCCTAGTTTCG    | 298 bp   |
|                                     | CH4-R     | TCAGTAGCCAAGATTTC       |          |
| chitinase 5-like                    | CH5-F     | TTCTTATGCTCCTAATCACCC   | 145 bp   |
|                                     | CH5-R     | CGAGTAGTCCCACAGTATCCA   |          |
| pathogenesis-related protein -4     | PR4-F     | AGGTGATGTACTCCGAGGCG    | 299 bp   |
|                                     | PR4-R     | GCAACGAGGTATTCAGAAGCAG  |          |
| pathogenesis-related protein 10     | PR10-F    | GTGGAGTTACCCCAGCAAG     | 136 bp   |
|                                     | PR10-R    | CAGAGTCAACGTCACCCTCA    |          |
| pathogenesis-related protein STH-21 | PRS-F     | AACAATACGCAAACGAAAG     | 233 bp   |
|                                     | PRS-R     | AACCAAGACGAACCGAGT      |          |
| pathogenesis-related protein 1a     | PR1a-F    | TATGCCTAGTTGTCGGTGGT    | 278 bp   |
|                                     | PR1a-R    | GTTGTTTGTGCTCCTGTTCC    |          |
| phenylalanine ammonia-lyase 1       | PAL1-F    | CAACCACTCATCAGACCCAC    | 252 bp   |
|                                     | PAL1-R    | GAGCCACTGTCAATGTTTCC    |          |
| phenylalanine ammonia-lyase 3       | PAL3-F    | ATGTTGGAAGCCATCACC      | 128 bp   |
|                                     | PAL3-R    | AGCCCAGCAATGTAGGAG      |          |
